# Supplementary material for: Muscle insulin sensitivity and glucose metabolism are controlled by the intrinsic muscle clock
Source: PubMed Central journal article supplement — Mol Metab. 2013 Oct 23;3(1):29–41. doi: 10.1016/j.molmet.2013.10.005 (PMC3929910; doi:10.1016/j.molmet.2013.10.005), 2013-10-23
Supplement: mmc1.pdf [file mmc1.pdf]

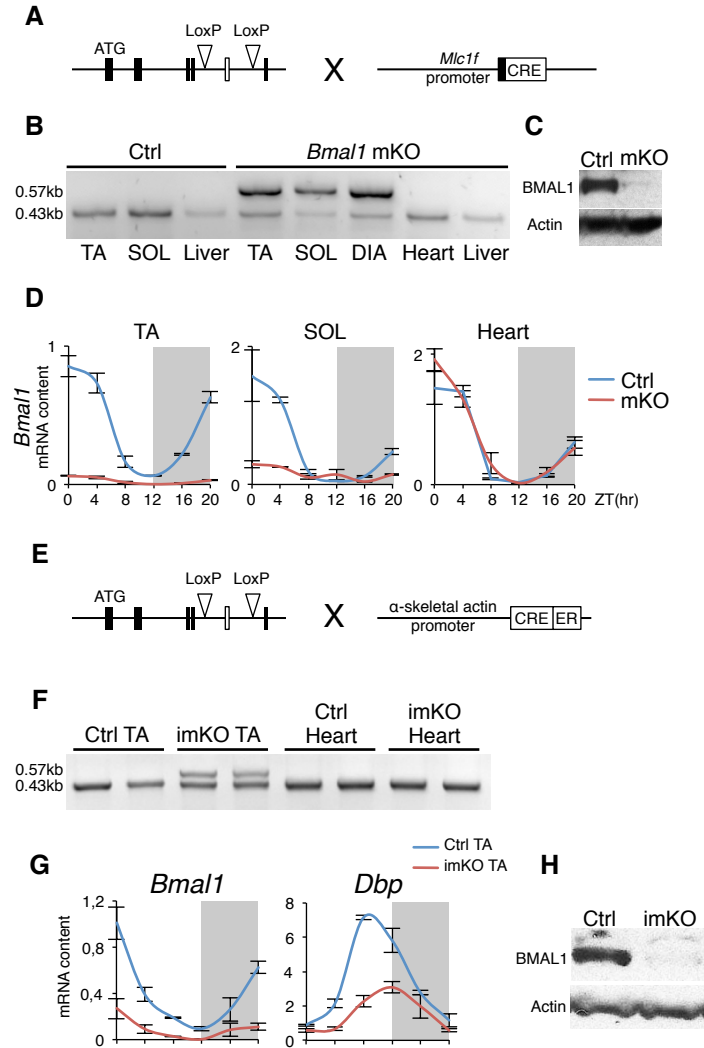

### Figure S1 Skeletal muscle-specific *Bmal1* knockout mice

**(A)** Scheme showing the generation of muscle-specific *Bmal1* knockout (mKO) mice. The exon encoding the BMAL1 basic helix-loop-helix DNA binding domain (open box) is deleted by Cre recombinase under control of the myosin light chain 1f (*Mlc1f*) promoter. **(B)** PCR products amplified from mouse DNA demonstrating the conditional floxed *Bmal1* allele (0.43kb band) in tissues from control mice (*Bmal1<sup>fl/fl</sup>; Mlc1f-Cre<sup>-/-</sup>*) and disruption of the *Bmal1* gene (excised allele, 0.57kb band) in skeletal muscles (tibialis anterior, TA; soleus, SOL; diaphragm, DIA), but not in heart or liver from mKO mice (*Bmal1<sup>fl/fl</sup>; Mlc1f-Cre<sup>+/-</sup>*). **(C)** Loss of BMAL1 protein in skeletal muscle (gastrocnemius) from *Bmal1* mKO mouse demonstrated by Western blotting with anti-BMAL1 antibody. **(D)** Diurnal expression profile of *Bmal1* in TA and SOL muscles, and in heart (ventricles) from muscle-specific *Bmal1* mKO mice and control littermates (Ctrl). Transcripts were detected by qPCR and plotted relative to *36B4* expression (mean $\pm$ SEM; arbitrary units; n=3/group/timepoint). Mice were sacrificed and tissues collected every 4 hours for 24 hours. ZT0=lights on, ZT12=lights off; dark phase shown by shaded area. **(E)** Generation of inducible muscle-specific *Bmal1* knockout (imKO) mice. The floxed *Bmal1* allele is deleted upon tamoxifen-mediated activation of the chimeric Cre recombinase, which is fused to a mutated estrogen receptor (ER) and controlled by the human  $\alpha$ -skeletal actin promoter. **(F)** PCR products amplified from mouse DNA demonstrating disruption of *Bmal1* in skeletal muscle (TA), but not in heart following tamoxifen treatment. **(G)** Mean temporal expression of *Bmal1* and *Dbp* detected by qPCR and plotted relative to *36B4* expression (mean $\pm$ SEM; arbitrary units; n=3-5/group/timepoint) in TA muscles from imKO mice and control littermates (Ctrl) 1 month after tamoxifen treatment. **(H)** Loss of BMAL1 protein in skeletal muscle demonstrated by western blotting with anti-BMAL1 antibody.

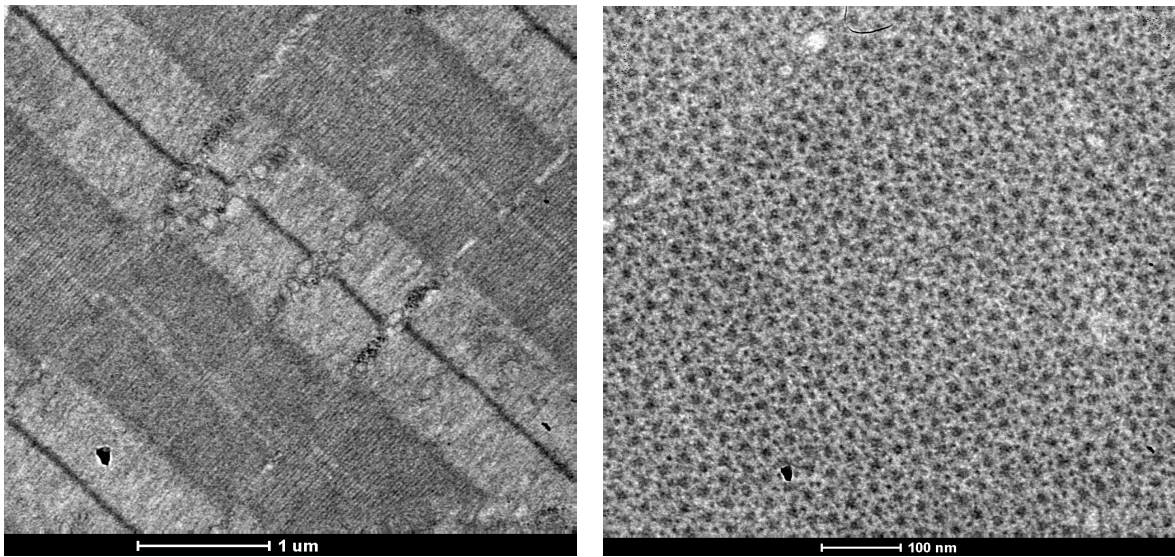

**Figure S2** Electron microscopy of gastrocnemius from 6 month old mKO mouse showing normal sarcomere ultrastructure in both longitudinal (left panel) and transversal section (right panel).

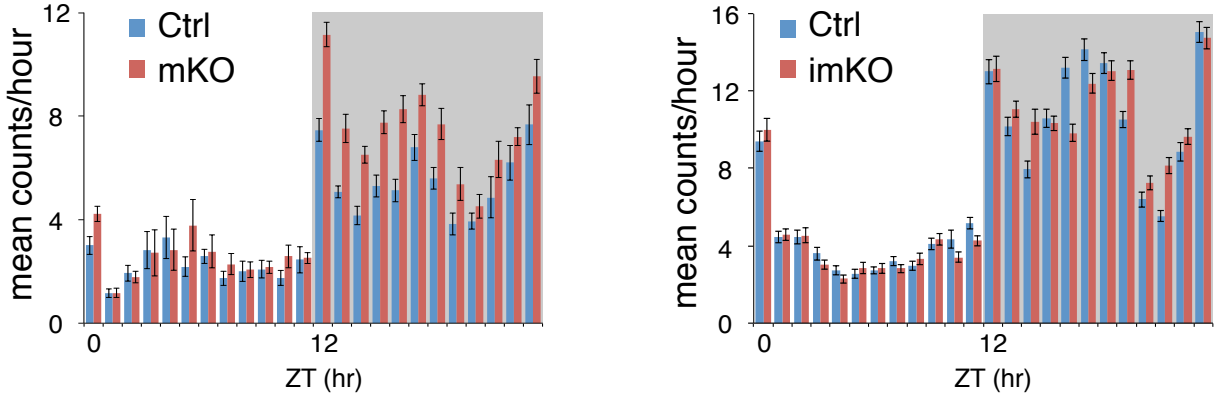

**Figure S3 Circadian locomotor activity monitored by telemetry**

Mean hourly locomotor activity counts from mKO mice and control littermates (left panel) and imKO mice and control littermates 1 month after tamoxifen (right panel) compared to controls (mean±SEM; n=3-5 mice/group). Mice were monitored continuously for 12 days.

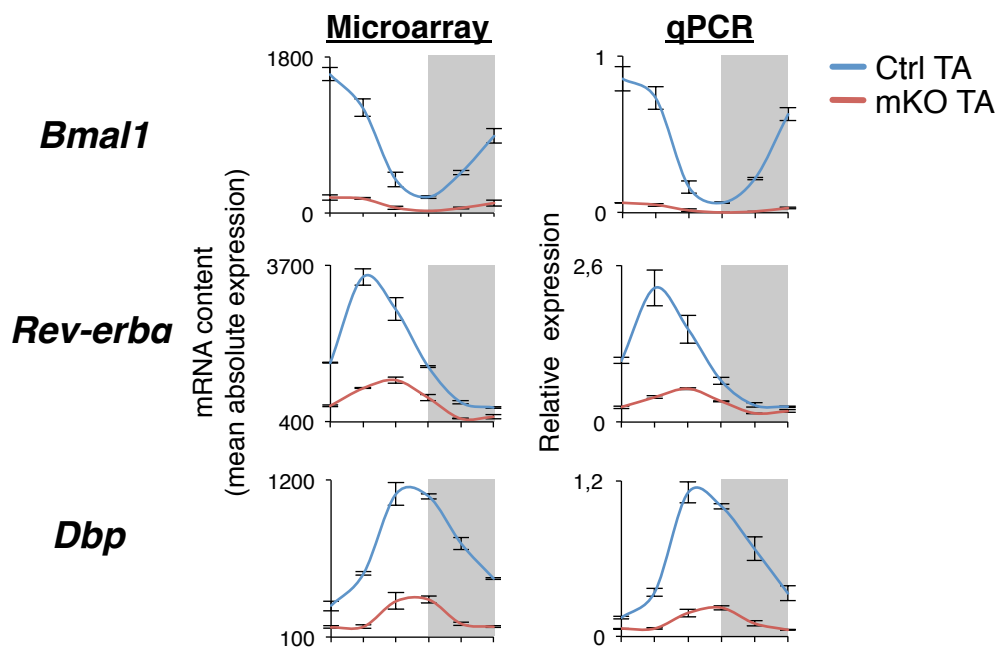

#### Figure S4 qPCR validation of selected genes

Microarray analysis of selected genes (mean $\pm$ SEM; n=3/group/timepoint), was validated by qPCR and plotted relative to *36B4* expression (mean $\pm$ SEM; arbitrary units; n=3/group/timepoint) in TA muscles. *Bmal1* microarray expression level was calculated summarizing only those oligonucleotide probes which hybridize to the exon coding for the *Bmal1* DNA binding domain, which is excised in mKO muscles.



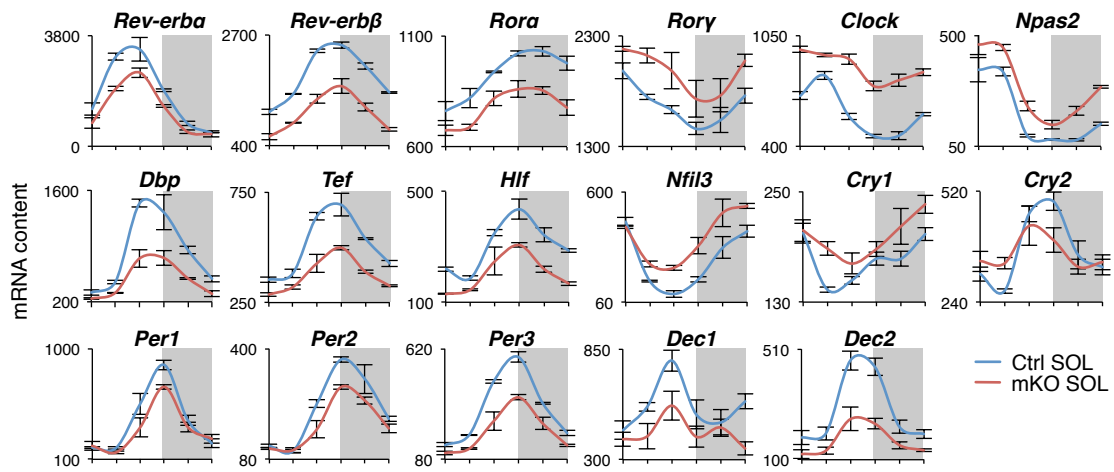

**Figure S5** Circadian expression of core clock and clock-associated genes in soleus (SOL) muscles from control and mKO mice determined by microarray analysis and plotted as mean absolute expression levels (mean $\pm$ SEM; n=3/group/timepoint).

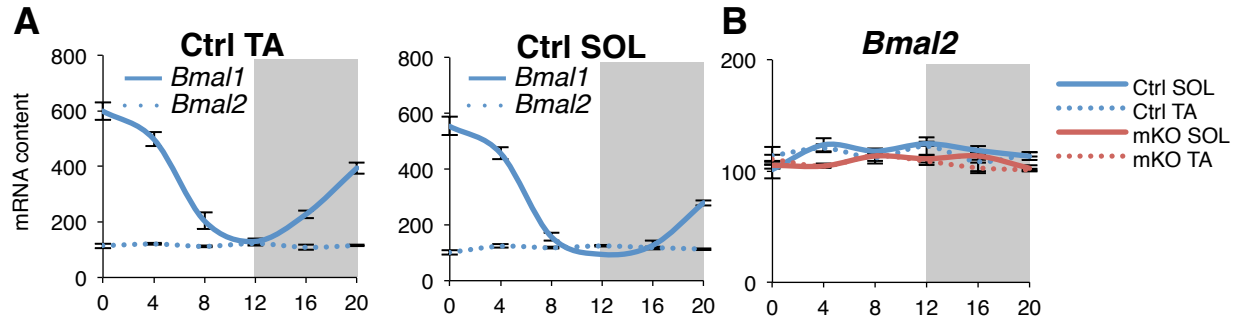

**Figure S6 (A)** Circadian expression of *Bmal2* (*Arntl2*) in TA and SOL muscles from control (Ctrl) mice determined by microarray analysis and plotted as mean absolute expression levels (mean±SEM; n=3/group/timepoint). **(B)** Comparison of *Bmal2* expression in Ctrl and mKO TA and SOL determined by microarray analysis (mean±SEM; n=3/group/timepoint).

A

# Tibialis Anterior

Ctrl      mKO

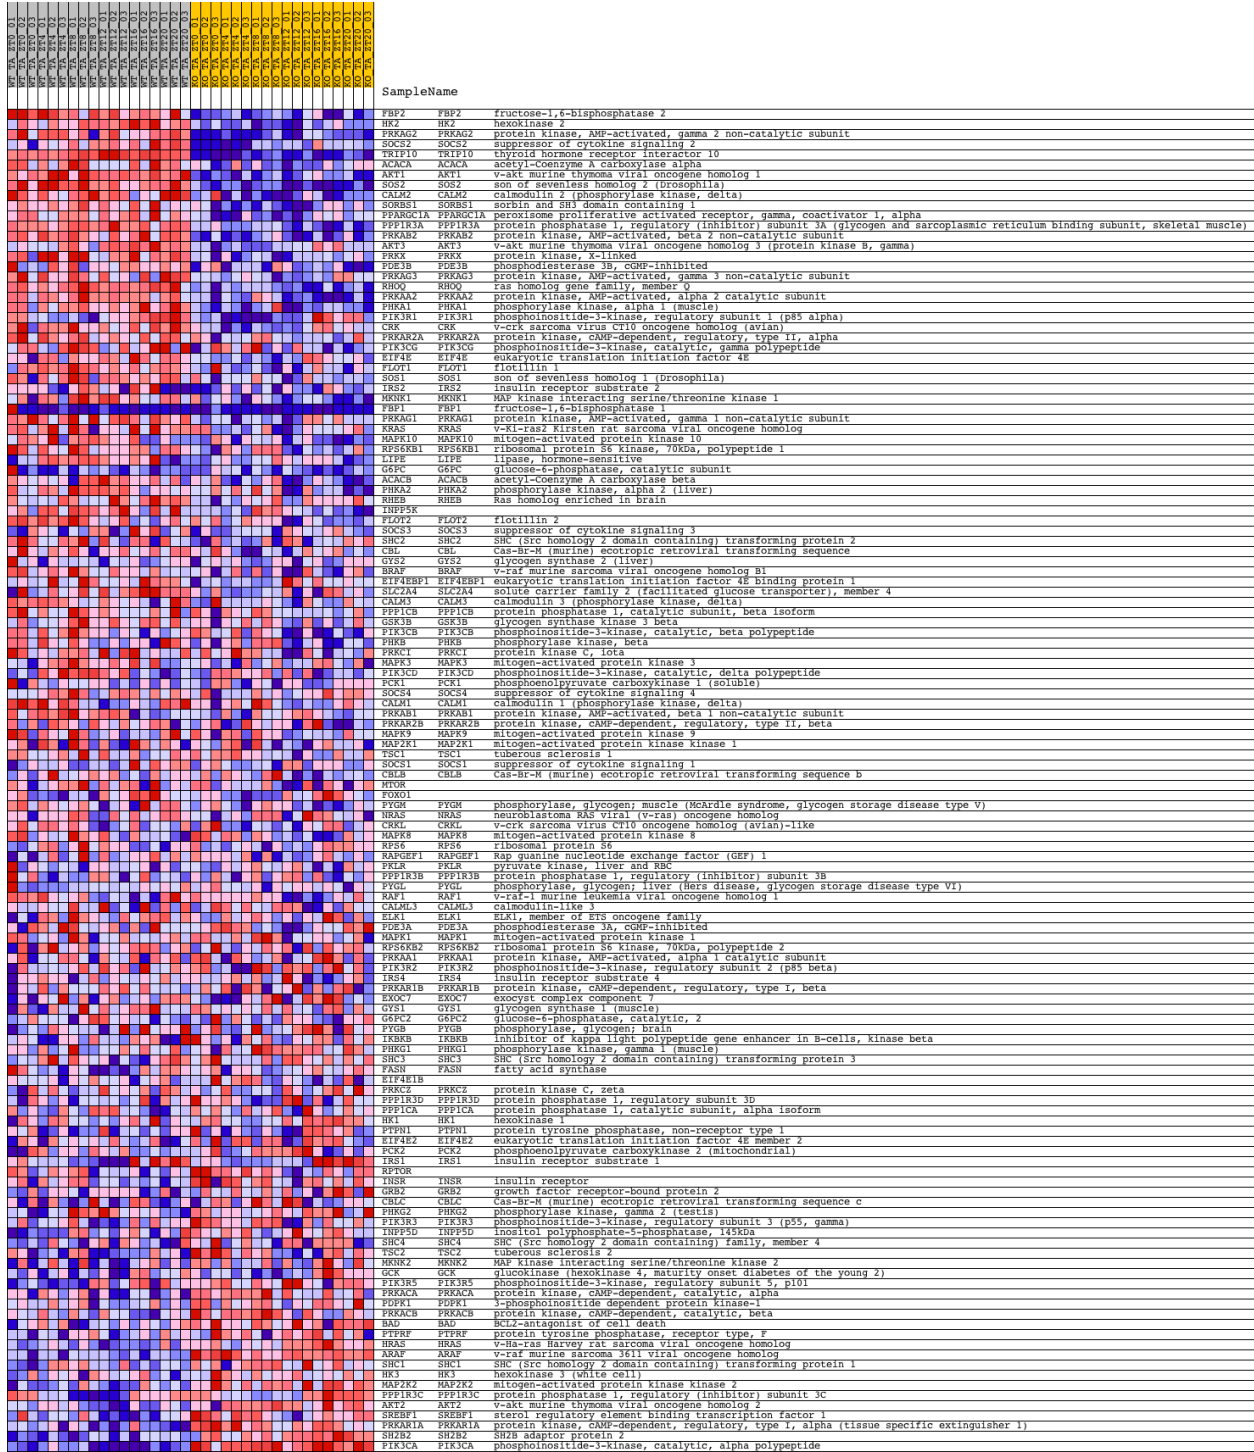

**Figure S7A** Heat map generated by GSEA of the KEGG\_INSULIN\_SIGNALING\_PATHWAY for Ctrl and mKO TA muscles. This “Blue-Pink O’ Gram in the Space of the Analyzed GeneSet” shows relative expression values as changes on a color spectrum, where the range of colors (red, pink, light blue, dark blue) shows the relative range of expression values (high, moderate, low, lowest).

B

# Soleus

Ctrl mKO

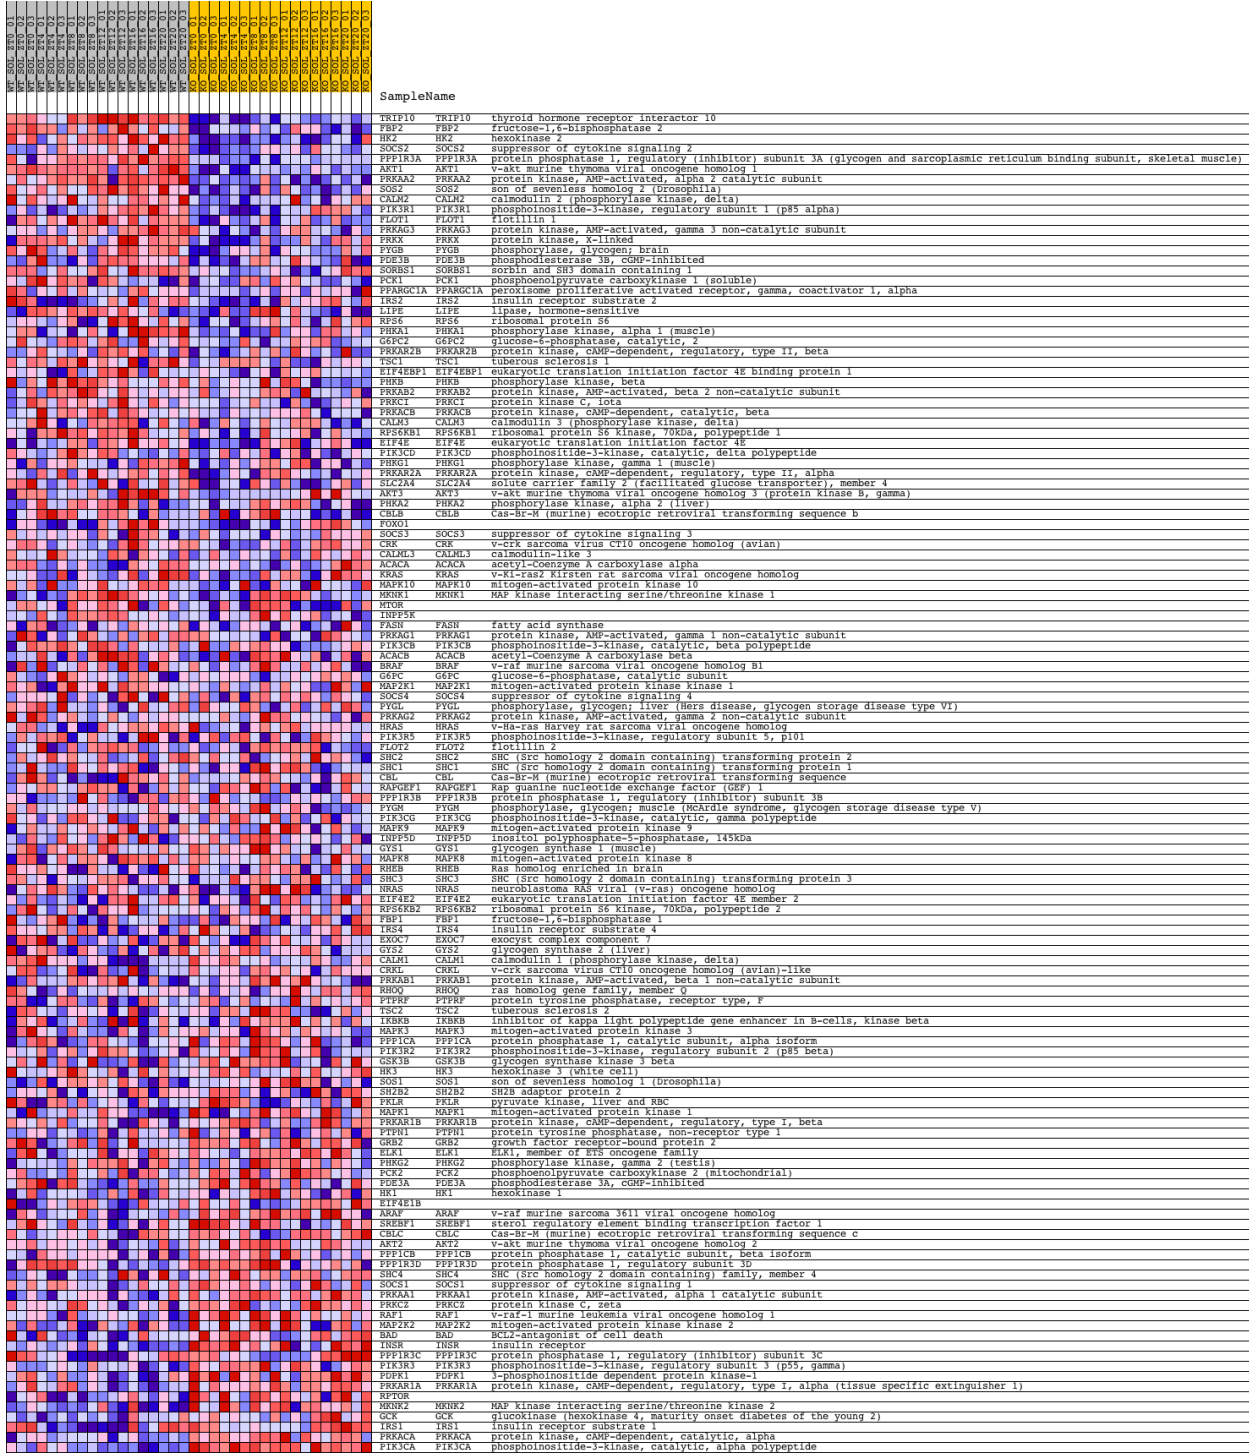

Figure S7B Same as Fig. S7A, but for SOL muscles.

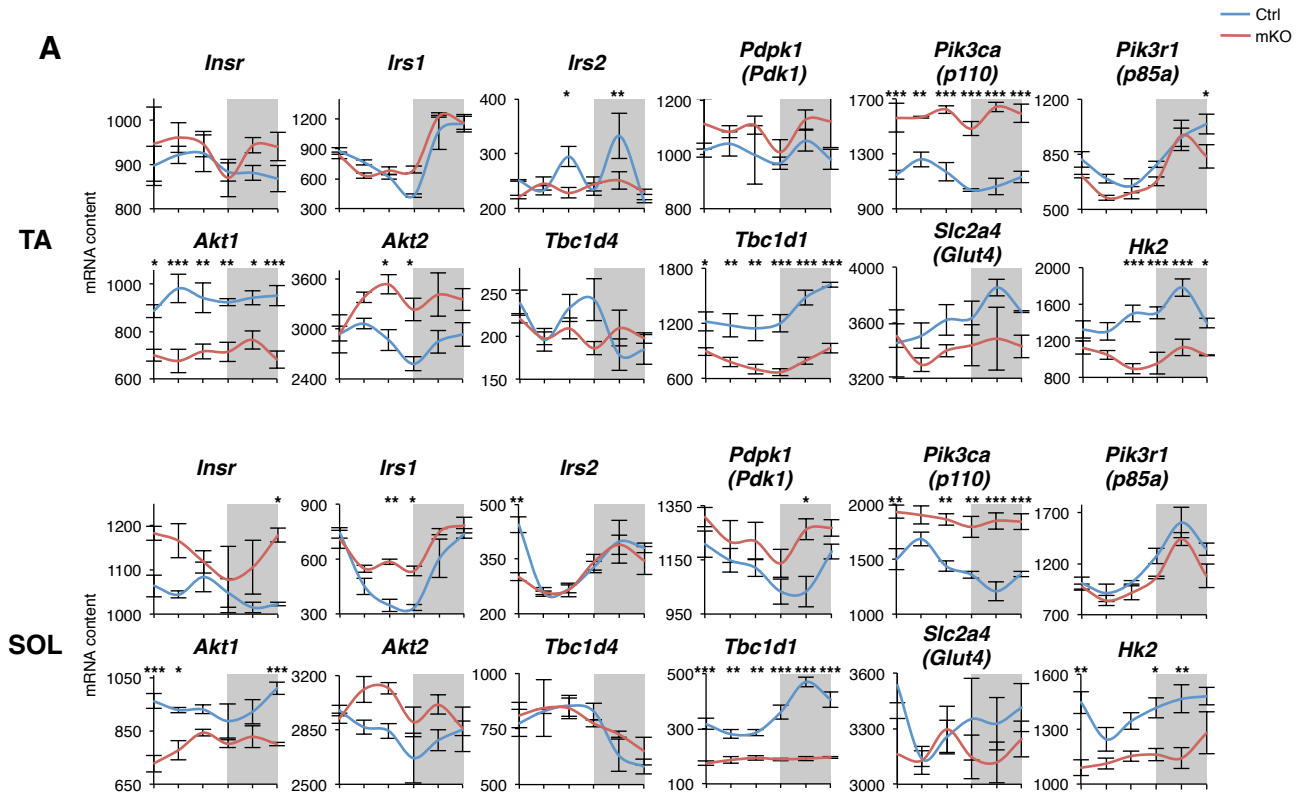

**Figure S8** Diurnal gene expression profiles of insulin signaling mediators in TA and SOL muscles from control and mKO mice determined by microarray analysis and plotted as mean absolute expression levels (mean±SEM; n=3/group/timepoint; \* $p$ <0.05, \*\* $p$ <0.01, \*\*\* $p$ <0.001, 2-way ANOVA with Bonferroni correction).

**A**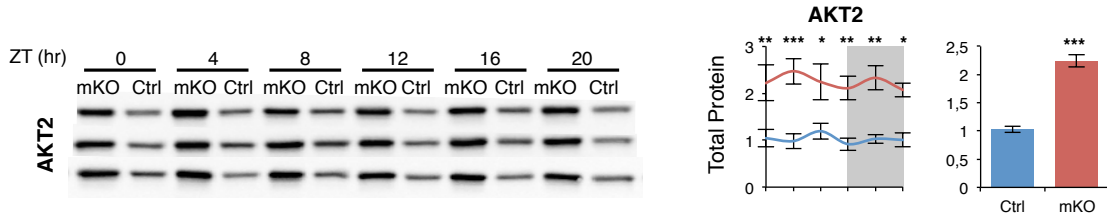**B**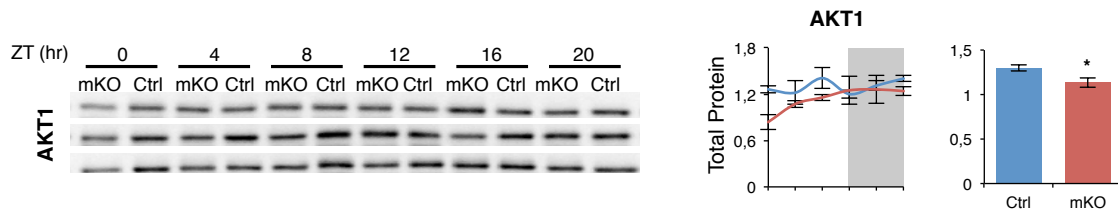

**Figure S9 (A,B)** Western blots showing 24-hr protein levels of AKT2 (**A**) and AKT1 (**B**) in mKO and Ctrl gastrocnemius muscles from 36 different mice ( $n=3/\text{group}/\text{timepoint}$ ). Middle panels show diurnal protein levels quantified by densitometry after western blot analysis (mean $\pm$ SEM; arbitrary units;  $n=3/\text{group}/\text{timepoint}$ ; \* $p<0.05$ , \*\* $p<0.01$ , \*\*\* $p<0.001$ , 2-way ANOVA with Bonferroni correction, AKT2 group effect  $F=80.8$ ,  $p<0.0001$ ; AKT1 group effect  $F=7.14$ ,  $p<0.05$ ). Right panels show mean 24-hr protein levels (mean $\pm$ SEM; arbitrary units;  $n=18/\text{group}$ ; \* $p<0.05$ , \*\*\* $p<0.0001$ , Student's t-test).

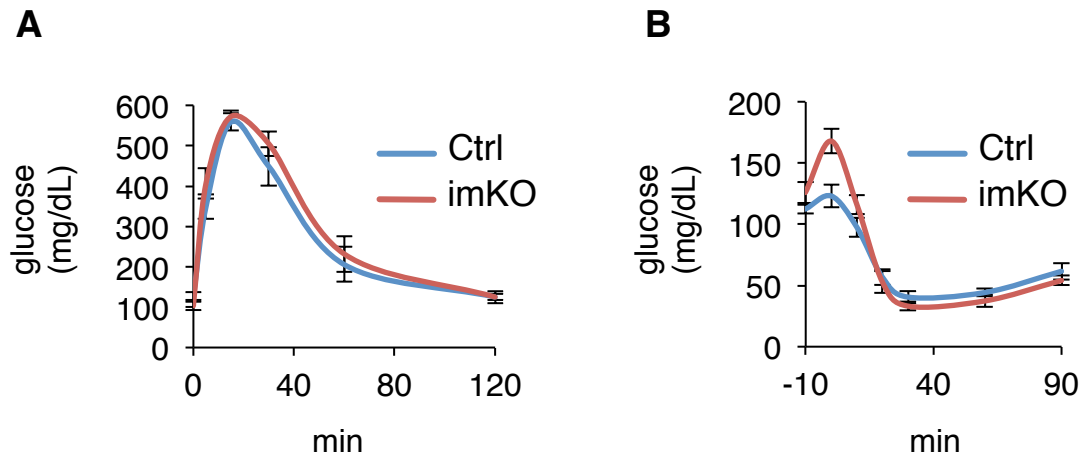

**Figure S10 (A)** Glucose tolerance test performed in imKO mice and control littermates (mean $\pm$ SEM; n=5-6/group). **(B)** Insulin tolerance test performed in imKO mice and control littermates (mean $\pm$ SEM; n=6/group).

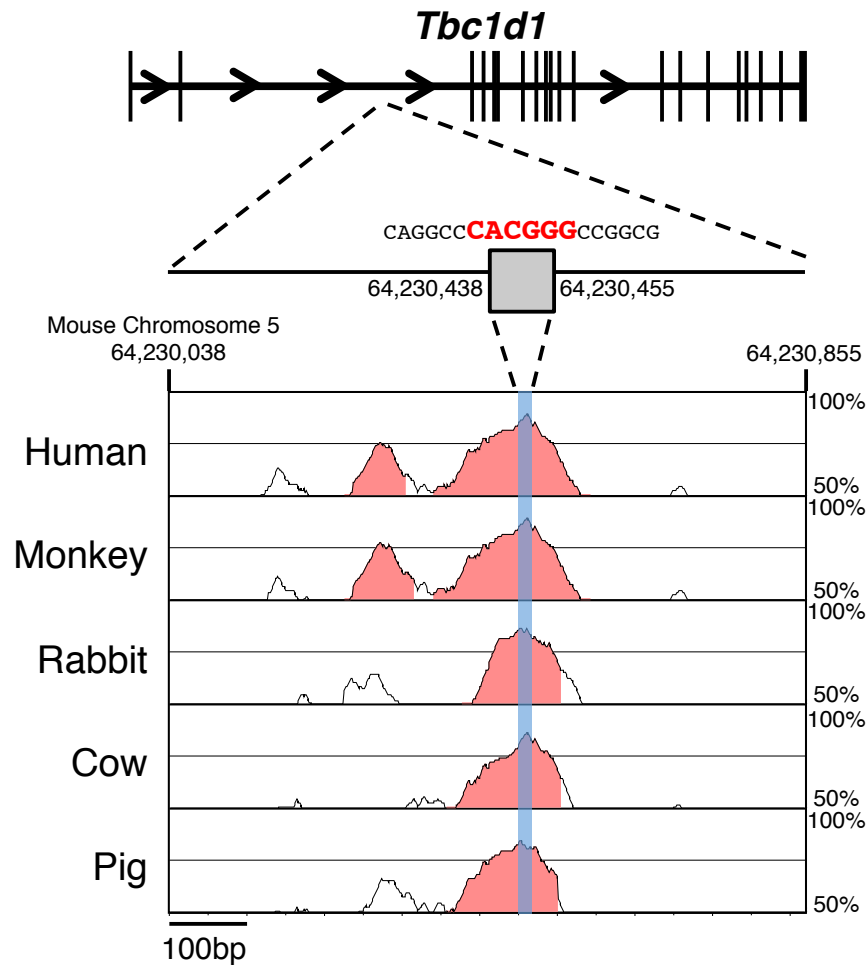

**Figure S11** Graphical representation showing the location of the putative CLOCK:BMAL1 binding site in relation to the *Tbc1d1* gene, and the output of the VISTA analysis of the -400bp to +400bp region flanking the binding motif generated by comparing the mouse sequence (base genome) to that of 5 different mammalian species. Pink peaks represent conserved non-coding sequences. The position on mouse Chromosome 5 is given above the graph; numbers on the right indicate the percentage of conservation.



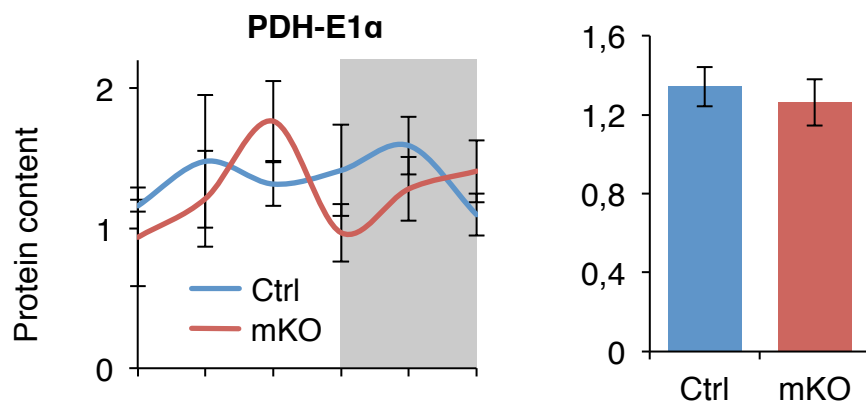

**Figure S12** Diurnal protein levels of PDH-E1 $\alpha$  in gastrocnemius from Ctrl and mKO mice quantified by densitometry of Western blot (n=3/group/timepoint; mean $\pm$ SEM; arbitrary units). Right panel shows mean PDH-E1 $\alpha$  for all timepoints in mKO and control (arbitrary units; mean $\pm$ SEM; n=18/group)

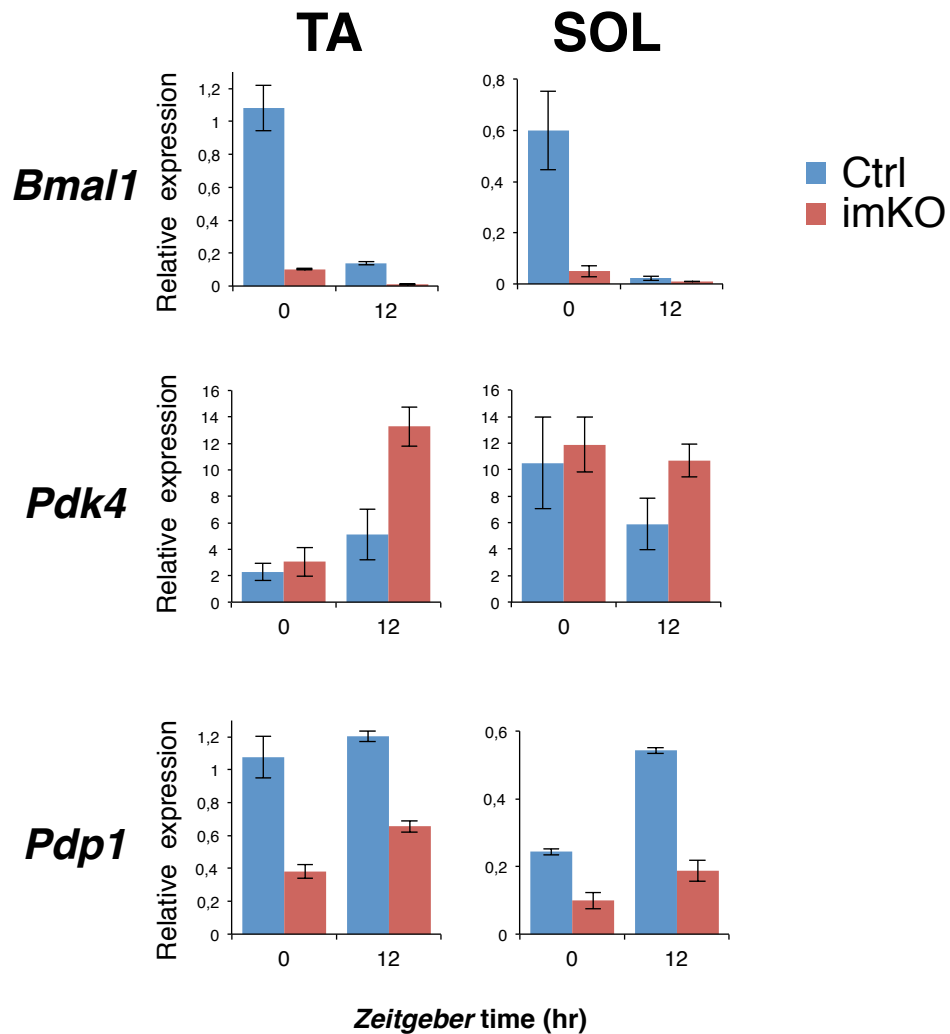

**Figure S13 Long-term ablation of *Bmal1* in inducible mKO line**

Gene expression in TA and SOL muscles from inducible muscle-specific *Bmal1* mKO mice (imKO) and control littermates (Ctrl). Mice were treated with tamoxifen (i.p. 1mg/day for 5 days) at 2 months of age, and sacrificed 5-months later at ZT0 and ZT12. Transcripts were detected by qPCR and plotted relative to *36B4* expression (mean±SEM; arbitrary units; n=3-4/group/timepoint).

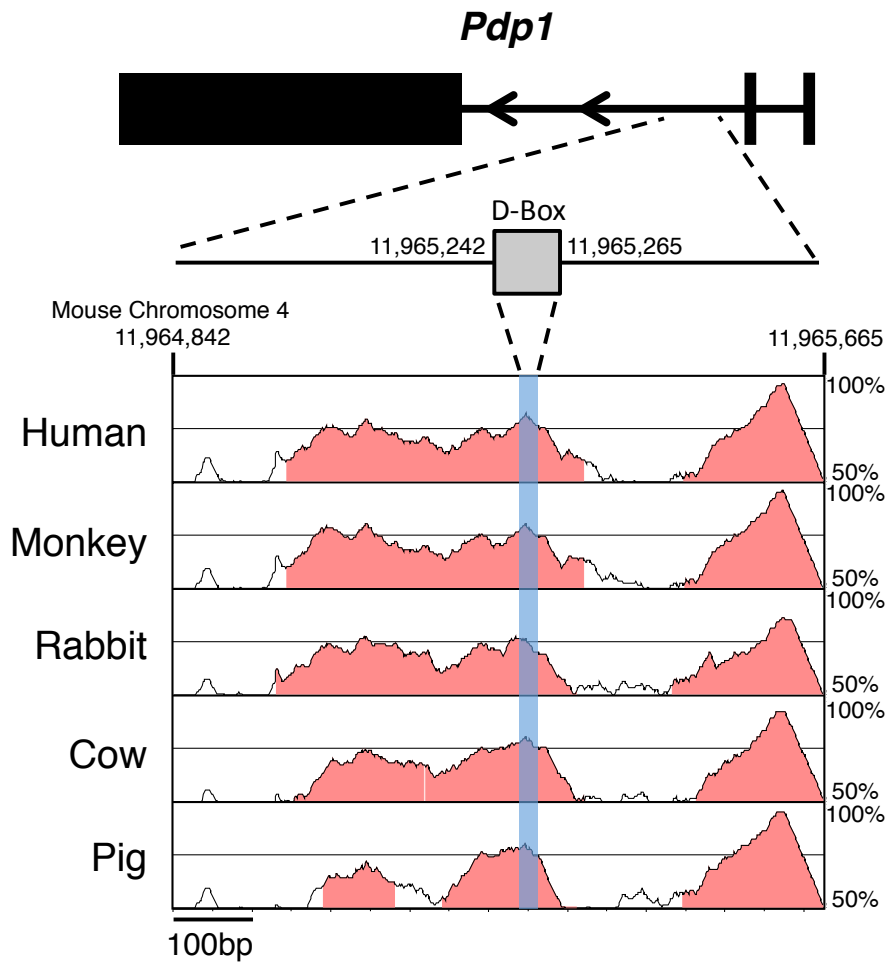

**Figure S14** Graphical representation showing the location of the putative D-Box binding site in relation to the *Pdp1* gene, and the output of the VISTA analysis of the -400bp to +400bp region flanking the binding motif generated by comparing the mouse sequence (base genome) to that of 5 different mammalian species. Pink peaks represent conserved non-coding sequences. The position on mouse Chromosome 4 is given above the graph; numbers on the right indicate the percentage of conservation.

**Table S1. Circadian metabolomic profiling of tibialis anterior muscle: changes in carbohydrate metabolism due to muscle-specific *Bmal1* knockout**

Heat map of statistically significant metabolites profiled in this study. Paired comparisons (mKO vs Ctrl, n=5) at six time points during the day/night cycle (ZT0: lights on; ZT12: lights off). Shaded cells indicate  $p \leq 0.05$  (red indicates that the mean values are significantly higher for that comparison; green indicates significantly lower; Blue cells indicate  $0.05 < p < 0.10$ ).

| SUPER PATHWAY | SUB PATHWAY                                                  | BIOCHEMICAL NAME                                                                               | HMDB                   | ANOVA Contrasts (Fold Change) |                         |                         |                           |                           |                           |      |
|---------------|--------------------------------------------------------------|------------------------------------------------------------------------------------------------|------------------------|-------------------------------|-------------------------|-------------------------|---------------------------|---------------------------|---------------------------|------|
|               |                                                              |                                                                                                |                        | mKO - ZT0<br>CTRL - ZT0       | mKO - ZT4<br>CTRL - ZT4 | mKO - ZT8<br>CTRL - ZT8 | mKO - ZT12<br>CTRL - ZT12 | mKO - ZT16<br>CTRL - ZT16 | mKO - ZT20<br>CTRL - ZT20 |      |
| Carbohydrate  | Aminosugars metabolism                                       | erythronate                                                                                    | HMDB00613              | 0.80                          | 0.81                    | 0.54                    | 0.76                      | 1.66                      | 0.88                      |      |
|               |                                                              | fucose                                                                                         | HMDB00174              | 1.07                          | 0.97                    | 0.55                    | 0.57                      | 1.07                      | 1.27                      |      |
|               | Fructose, mannose, galactose, starch, and sucrose metabolism | fructose                                                                                       | HMDB00660              | 1.69                          | 1.77                    | 0.76                    | 1.04                      | 1.14                      | 1.13                      |      |
|               |                                                              | galactitol                                                                                     | HMDB00107              | 1.50                          | 1.08                    | 1.00                    | 1.42                      | 1.73                      | 1.42                      |      |
|               |                                                              | 6'-sialyllactose                                                                               | HMDB06569              | 1.52                          | 1.24                    | 1.49                    | 1.32                      | 1.49                      | 1.61                      |      |
|               |                                                              | maltose                                                                                        | HMDB00163              | 1.16                          | 0.74                    | 0.69                    | 0.97                      | 0.71                      | 0.96                      |      |
|               |                                                              | mannitol                                                                                       | HMDB00765              | 1.22                          | 0.93                    | 0.85                    | 1.21                      | 1.51                      | 1.27                      |      |
|               |                                                              | mannose                                                                                        | HMDB00169              | 2.09                          | 2.00                    | 0.99                    | 0.86                      | 1.12                      | 0.96                      |      |
|               |                                                              | mannose-6-phosphate                                                                            | HMDB01078              | 1.80                          | 4.35                    | 1.21                    | 0.17                      | 0.88                      | 0.57                      |      |
|               |                                                              | sorbitol                                                                                       | HMDB00247              | 1.29                          | 1.38                    | 1.00                    | 1.16                      | 1.59                      | 1.77                      |      |
|               |                                                              | maltotriose                                                                                    | HMDB01262              | 1.47                          | 0.78                    | 0.73                    | 1.14                      | 0.54                      | 0.81                      |      |
|               |                                                              | maltotetraose                                                                                  | HMDB01296              | 1.77                          | 1.13                    | 0.88                    | 1.01                      | 0.63                      | 1.18                      |      |
|               | Glycolysis, gluconeogenesis, pyruvate metabolism             | 1,5-anhydroglucitol (1,5-AG)                                                                   | HMDB02712              | 1.00                          | 0.97                    | 0.85                    | 0.97                      | 1.09                      | 1.21                      |      |
|               |                                                              | glycerate                                                                                      | HMDB00139              | 0.90                          | 0.79                    | 1.21                    | 0.91                      | 1.01                      | 0.74                      |      |
|               |                                                              | glucose-6-phosphate (G6P)                                                                      | HMDB01401              | 1.92                          | 4.43                    | 1.29                    | 0.15                      | 0.87                      | 0.61                      |      |
|               |                                                              | glucose 1-phosphate                                                                            | HMDB01586              | 1.74                          | 1.69                    | 0.79                    | 1.03                      | 0.92                      | 1.28                      |      |
|               |                                                              | glucose                                                                                        | HMDB00122              | 1.37                          | 1.04                    | 0.92                    | 1.14                      | 1.03                      | 1.03                      |      |
|               |                                                              | 1,6-anhydroglucose                                                                             | HMDB00640              | 1.35                          | 0.97                    | 1.09                    | 0.93                      | 0.78                      | 1.22                      |      |
|               |                                                              | fructose-6-phosphate                                                                           | HMDB00124              | 1.88                          | 3.44                    | 1.17                    | 0.24                      | 0.83                      | 0.72                      |      |
|               |                                                              | fructose 1-phosphate                                                                           | HMDB01076              | 1.53                          | 1.01                    | 0.98                    | 1.13                      | 1.05                      | 0.88                      |      |
|               |                                                              | Isobar: fructose 1,6-diphosphate, glucose 1,6-diphosphate, myo-inositol 1,4 or 1,3-diphosphate |                        | 1.53                          | 0.97                    | 1.21                    | 1.01                      | 1.03                      | 0.84                      |      |
|               |                                                              | 2-phosphoglycerate                                                                             | HMDB03391              | 0.86                          | 0.73                    | 1.21                    | 0.78                      | 1.01                      | 0.75                      |      |
|               |                                                              | 3-phosphoglycerate                                                                             | HMDB00807              | 0.91                          | 0.73                    | 1.07                    | 0.78                      | 1.13                      | 0.73                      |      |
|               |                                                              | dihydroxyacetone phosphate (DHAP)                                                              | HMDB01473              | 1.04                          | 1.27                    | 1.56                    | 2.20                      | 2.11                      | 0.80                      |      |
|               |                                                              | phosphoenolpyruvate (PEP)                                                                      | HMDB00263              | 0.97                          | 0.70                    | 1.18                    | 0.97                      | 1.19                      | 0.79                      |      |
|               |                                                              | pyruvate                                                                                       | HMDB00243              | 0.85                          | 0.93                    | 1.10                    | 0.72                      | 1.02                      | 0.79                      |      |
|               |                                                              | lactate                                                                                        | HMDB00190              | 0.95                          | 0.90                    | 0.93                    | 0.95                      | 1.14                      | 0.97                      |      |
|               |                                                              | Nucleotide sugars, pentose metabolism                                                          | arabitol               | HMDB01851                     | 1.71                    | 0.87                    | 0.99                      | 1.15                      | 1.65                      | 1.43 |
|               |                                                              |                                                                                                | ribitol                | HMDB00508                     | 1.29                    | 1.36                    | 1.41                      | 1.42                      | 1.60                      | 1.39 |
|               |                                                              |                                                                                                | ribose                 | HMDB00283                     | 1.26                    | 1.01                    | 1.20                      | 1.07                      | 1.38                      | 1.01 |
|               | ribose 5-phosphate                                           |                                                                                                | HMDB00618              | 0.93                          | 0.90                    | 1.21                    | 0.71                      | 1.61                      | 0.63                      |      |
|               | ribulose                                                     |                                                                                                | HMDB00621<br>HMDB03371 | 1.29                          | 1.00                    | 1.29                    | 1.16                      | 1.33                      | 0.88                      |      |
|               | Isobar: ribulose 5-phosphate, xylulose 5-phosphate           |                                                                                                |                        | 0.99                          | 0.98                    | 1.03                    | 0.87                      | 1.35                      | 0.83                      |      |
|               | xylitol                                                      |                                                                                                | HMDB00568              | 4.19                          | 1.00                    | 0.95                    | 1.55                      | 2.84                      | 1.56                      |      |
|               | xylulose                                                     |                                                                                                | HMDB00654              | 1.38                          | 1.21                    | 1.27                    | 1.18                      | 1.59                      | 1.12                      |      |
